# Supplementary material for: Recent adverse mortality trends in Scotland: comparison with other high-income countries
Source: PubMed Central journal article supplement — BMJ Open. 2019 Oct 31;9(10):e029936. doi: 10.1136/bmjopen-2019-029936 (PMC6830653; doi:10.1136/bmjopen-2019-029936), 2019-10-31
Supplement: bmjopen-2019-029936supp005.pdf [file bmjopen-2019-029936supp005.pdf]

Supplementary table 1a: mean annual change in life expectancy at birth (weeks), for five-year periods 1992-2016, for females, by country.

| Female           |           |           |           |           |           |
|------------------|-----------|-----------|-----------|-----------|-----------|
| Country          | 1992-1996 | 1997-2001 | 2002-2006 | 2007-2011 | 2012-2016 |
| Northern Ireland | 9.0       | 12.8      | 7.5       | 13.7      | -1.2      |
| Iceland          | 0.1       | 18.1      | -1.2      | 11.3      | 0.1       |
| England & Wales  | 8.3       | 10.6      | 11.2      | 13.0      | 1.1       |
| USA              | 2.6       | 3.2       | 8.9       | 8.5       | 1.9       |
| Scotland         | 7.0       | 10.4      | 9.8       | 11.0      | 2.5       |
| Netherlands      | 1.9       | 4.1       | 12.3      | 10.1      | 2.7       |
| France           | 9.2       | 9.3       | 12.8      | 8.5       | 3.4       |
| Sweden           | 10.2      | 5.5       | 8.8       | 8.0       | 4.4       |
| Germany          | 12.2      | 14.7      | 10.1      | 6.1       | 4.6       |
| Austria          | 11.4      | 15.4      | 11.1      | 8.3       | 5.3       |
| Switzerland      | 9.4       | 10.1      | 9.2       | 8.8       | 5.7       |
| Spain            | 13.0      | 12.2      | 10.8      | 9.3       | 7.2       |
| Israel           | 15.3      | 12.8      | 10.8      | 10.8      | 8.2       |
| Estonia          | 6.6       | 9.6       | 21.7      | 24.9      | 9.2       |
| Latvia           | -0.8      | 10.9      | 6.4       | 25.3      | 9.2       |
| Slovakia         | 15.9      | 9.0       | 7.6       | 13.2      | 9.3       |
| Lithuania        | -0.2      | 17.6      | -4.3      | 20.8      | 9.5       |
| Poland           | 15.1      | 18.7      | 12.8      | 12.2      | 10.0      |
| Denmark          | 2.9       | 9.9       | 13.5      | 13.7      | 10.0      |
| Croatia*         | -         | -         | 9.6       | 10.1      | 10.0      |
| Czech Republic   | 16.3      | 12.4      | 14.0      | 10.4      | 10.5      |
| Hungary          | 10.7      | 16.2      | 10.4      | 9.8       | 11.1      |
| Japan            | 13.9      | 14.0      | 8.9       | 1.8       | 13.3      |
| Korea*           | -         | -         | 14.8      | 19.6      | 14.5      |

\*Data not available for Croatia and Korea for first two periods.

Supplementary table 1b: mean annual change in life expectancy at birth (weeks), for five-year periods 1992-2016, for males, by country.

| Country          | Male      |           |           |           |           |
|------------------|-----------|-----------|-----------|-----------|-----------|
|                  | 1992-1996 | 1997-2001 | 2002-2006 | 2007-2011 | 2012-2016 |
| Iceland          | 17.2      | 18.4      | 11.3      | 11.4      | -1.7      |
| USA              | 10.8      | 12.5      | 10.5      | 12.0      | -0.4      |
| England & Wales  | 12.3      | 15.5      | 14.9      | 17.3      | 4.0       |
| Scotland         | 6.6       | 14.1      | 15.3      | 17.3      | 4.5       |
| Germany          | 13.8      | 19.3      | 15.3      | 10.7      | 6.3       |
| Netherlands      | 6.2       | 12.1      | 18.9      | 16.3      | 7.1       |
| Sweden           | 16.3      | 10.6      | 12.0      | 11.5      | 8.0       |
| Israel           | 11.0      | 8.7       | 16.0      | 13.4      | 8.1       |
| France           | 12.4      | 14.1      | 18.1      | 13.2      | 9.4       |
| Northern Ireland | 15.2      | 14.2      | 10.0      | 17.7      | 9.5       |
| Spain            | 12.3      | 16.7      | 14.7      | 16.1      | 10.5      |
| Austria          | 14.6      | 20.1      | 15.5      | 10.3      | 11.1      |
| Croatia*         | -         | -         | 13.9      | 14.4      | 11.9      |
| Switzerland      | 19.0      | 14.7      | 17.6      | 13.0      | 12.9      |
| Latvia           | -9.9      | 15.9      | 7.3       | 37.3      | 12.9      |
| Denmark          | 6.0       | 16.8      | 12.8      | 18.7      | 13.0      |
| Poland           | 22.2      | 21.4      | 9.9       | 15.7      | 13.7      |
| Czech Republic   | 21.6      | 17.8      | 15.2      | 12.9      | 13.8      |
| Hungary          | 12.4      | 19.7      | 9.3       | 21.5      | 14.7      |
| Lithuania        | -5.4      | 13.4      | -8.8      | 31.0      | 14.9      |
| Slovakia         | 20.1      | 7.9       | 9.9       | 19.1      | 15.5      |
| Japan            | 9.2       | 10.3      | 9.5       | 5.3       | 16.1      |
| Estonia          | -0.4      | 7.6       | 25.8      | 38.1      | 19.7      |
| Korea*           | -         | -         | 17.4      | 19.3      | 20.6      |

\*Data not available for Croatia and Korea for first two periods.
