# Supplementary figures and images for: Recent adverse mortality trends in Scotland: comparison with other high-income countries
Source: PubMed Central journal article supplement — BMJ Open. 2019 Oct 31;9(10):e029936. doi: 10.1136/bmjopen-2019-029936 (PMC6830653; doi:10.1136/bmjopen-2019-029936), 2019-10-31

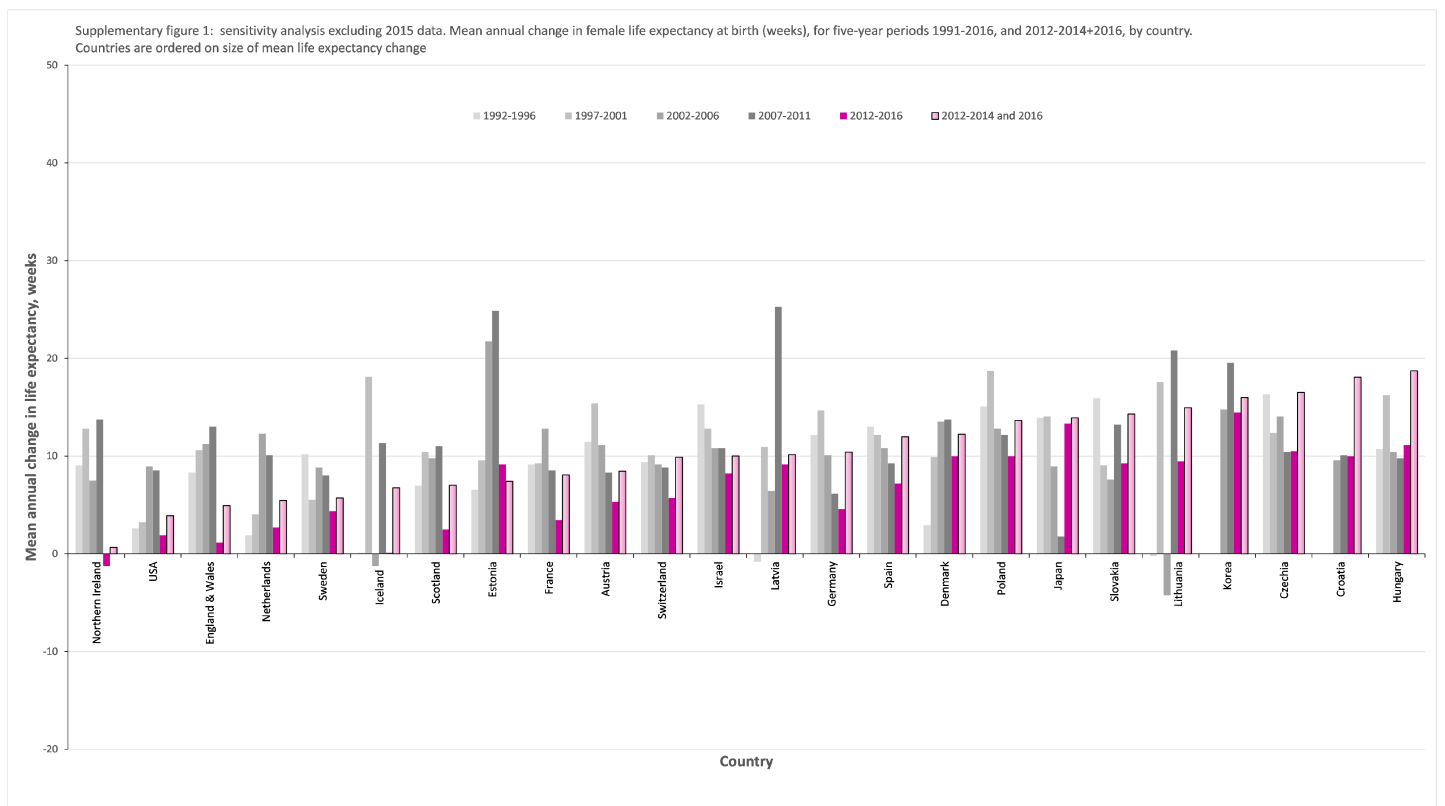

Supplement: bmjopen-2019-029936supp001.pdf [file bmjopen-2019-029936supp001.pdf]

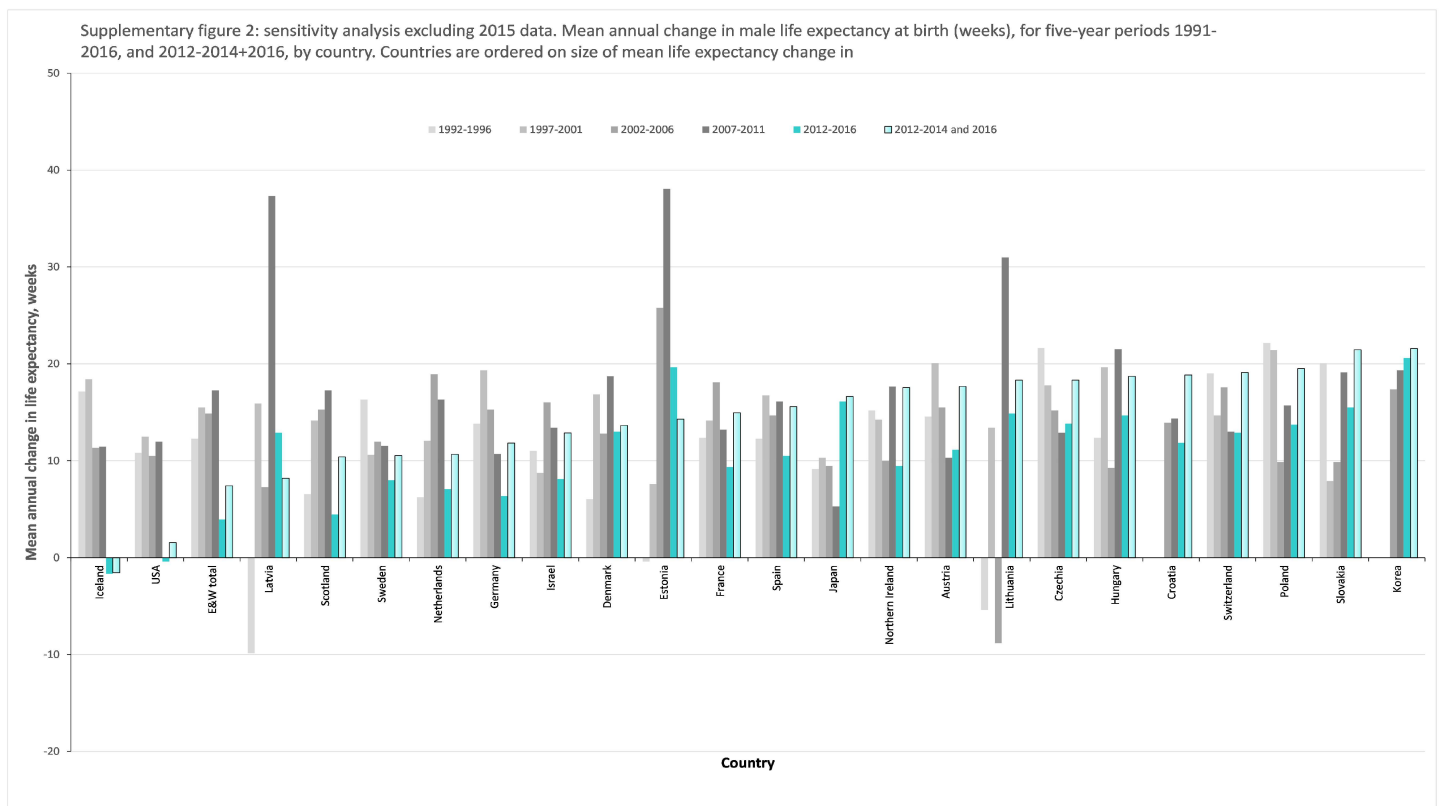

Supplement: bmjopen-2019-029936supp002.pdf [file bmjopen-2019-029936supp002.pdf]

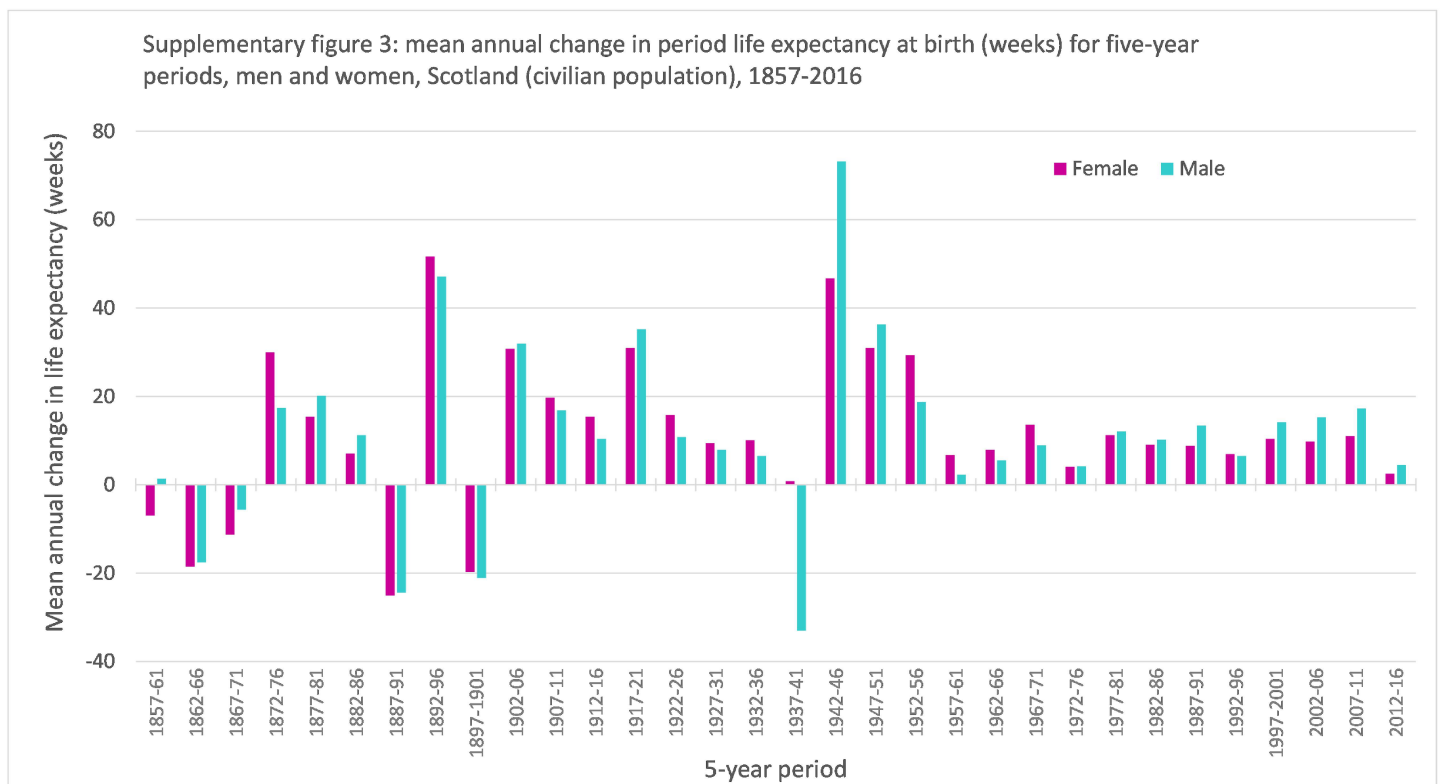

Supplement: bmjopen-2019-029936supp003.pdf [file bmjopen-2019-029936supp003.pdf]

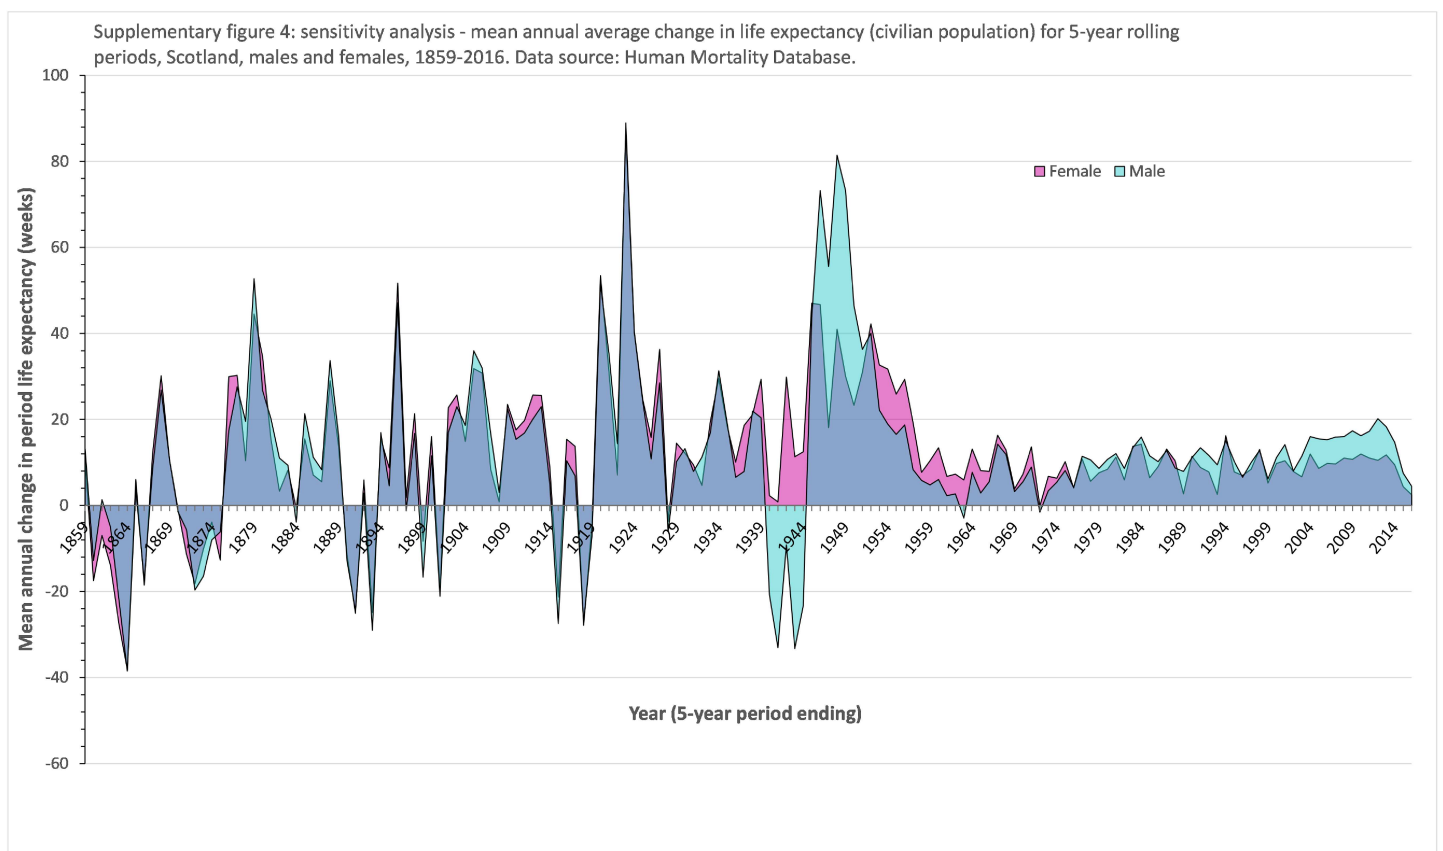

Supplement: bmjopen-2019-029936supp004.pdf [file bmjopen-2019-029936supp004.pdf]
